# Supplementary material for: The neuroendocrine transition in prostate cancer is dynamic and dependent on ASCL1
Source: PubMed Central journal article supplement (PMC11030418; doi:10.1101/2024.04.09.588557), 2024-04-11
Supplement: media-1.pdf [file media-1.pdf]

# EXTENDED DATA FIGURE 1:

a.

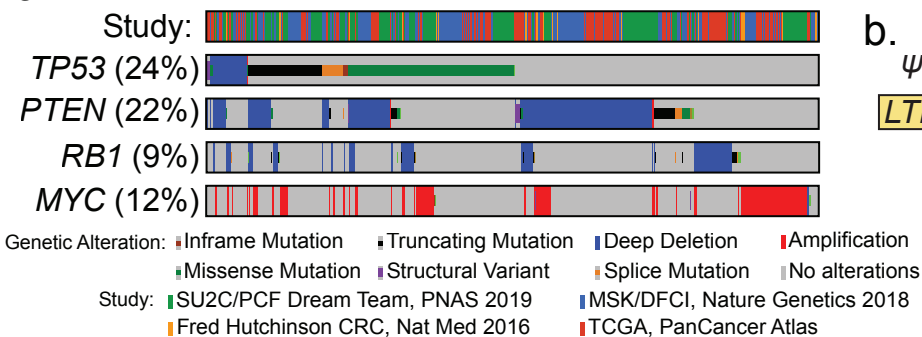

b.

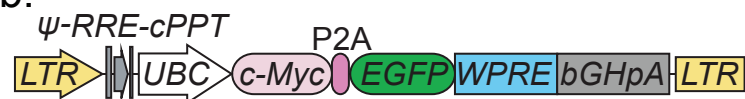

c.

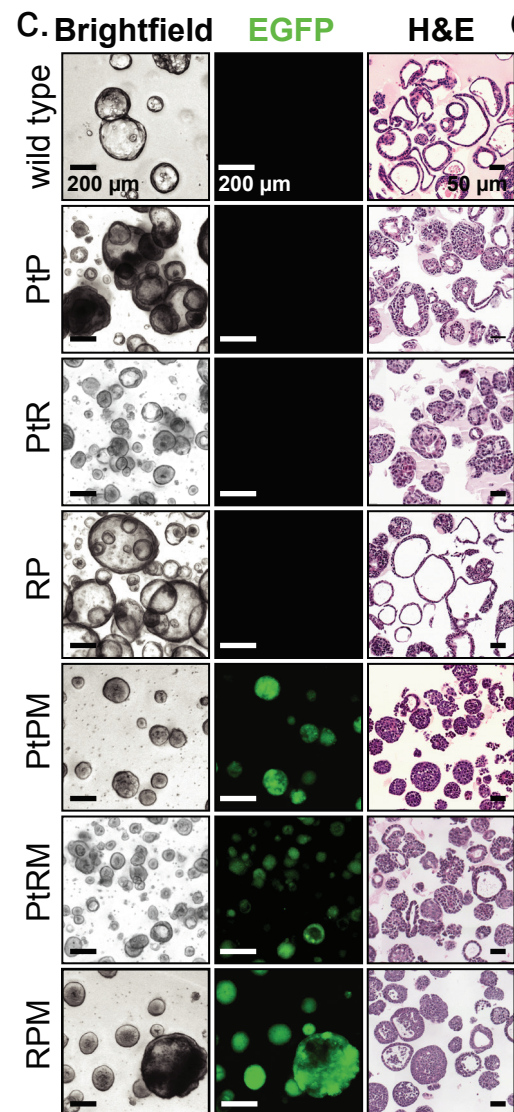

d.

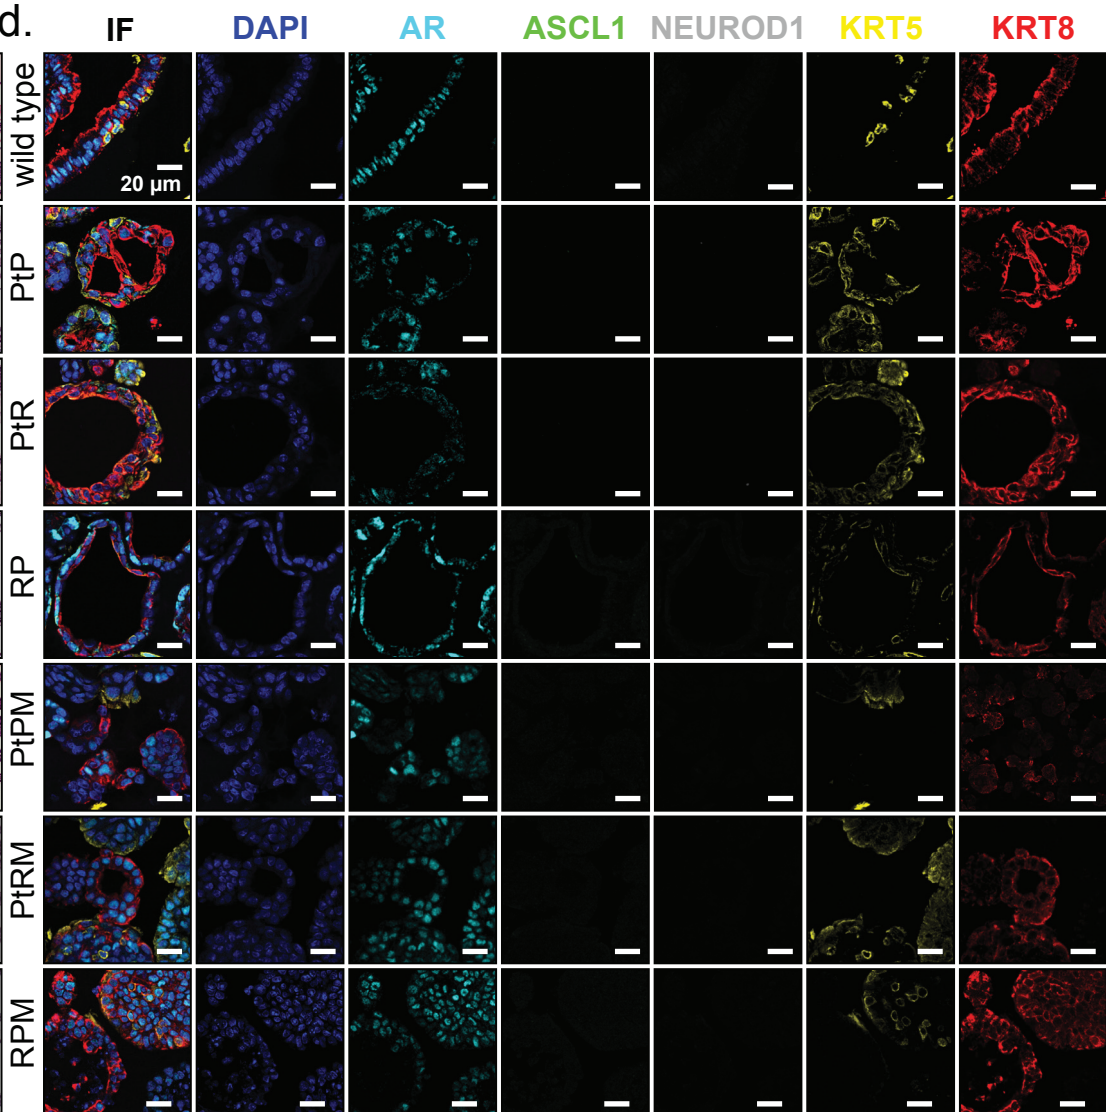

e.

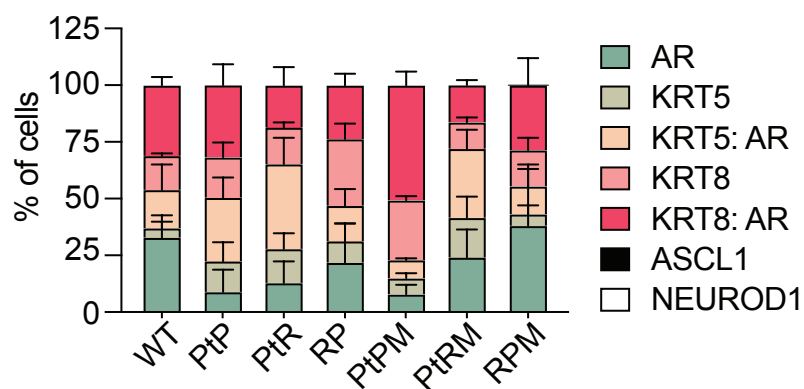

1 **Extended Data Figure 1:**

2 **a.** Oncoprint of the indicated genes frequently mutated in human primary prostate  
3 cancer. Samples obtained from the studies indicated within the figure legend. **b.**  
4 Schematic of the lentiviral vector used within this study to overexpress *cMyc*<sup>T58A</sup>  
5 transcriptionally linked to EGFP in organoids. **c.** Representative brightfield (left), GFP  
6 fluorescence (center), and hematoxylin & eosin (H&E) stains (right) of organoids  
7 harboring mutations in indicated tumor suppressors and oncogenes. **d.** Representative  
8 confocal images of 7-plex IF stains of organoids of the indicated proteins. Data are  
9 representative of *n*=3 technical replicates per genotype. **e.** Percentage of unique cell  
10 types expressing the indicated markers in organoid culture. Data representative of *n*=3  
11 technical replicates and related to Extended Data Fig. 1d. Error bars denote mean and  
12 standard deviation. All scale bars and pseudocolor legend indicated within the figure  
13 panel.

14  
15  
16  
17  
18  
19  
20  
21  
22  
23  
24  
25  
26  
27  
28  
29  
30  
31  
32  
33  
34  
35  
36  
37  
38  
39  
40



# EXTENDED DATA FIGURE 2:

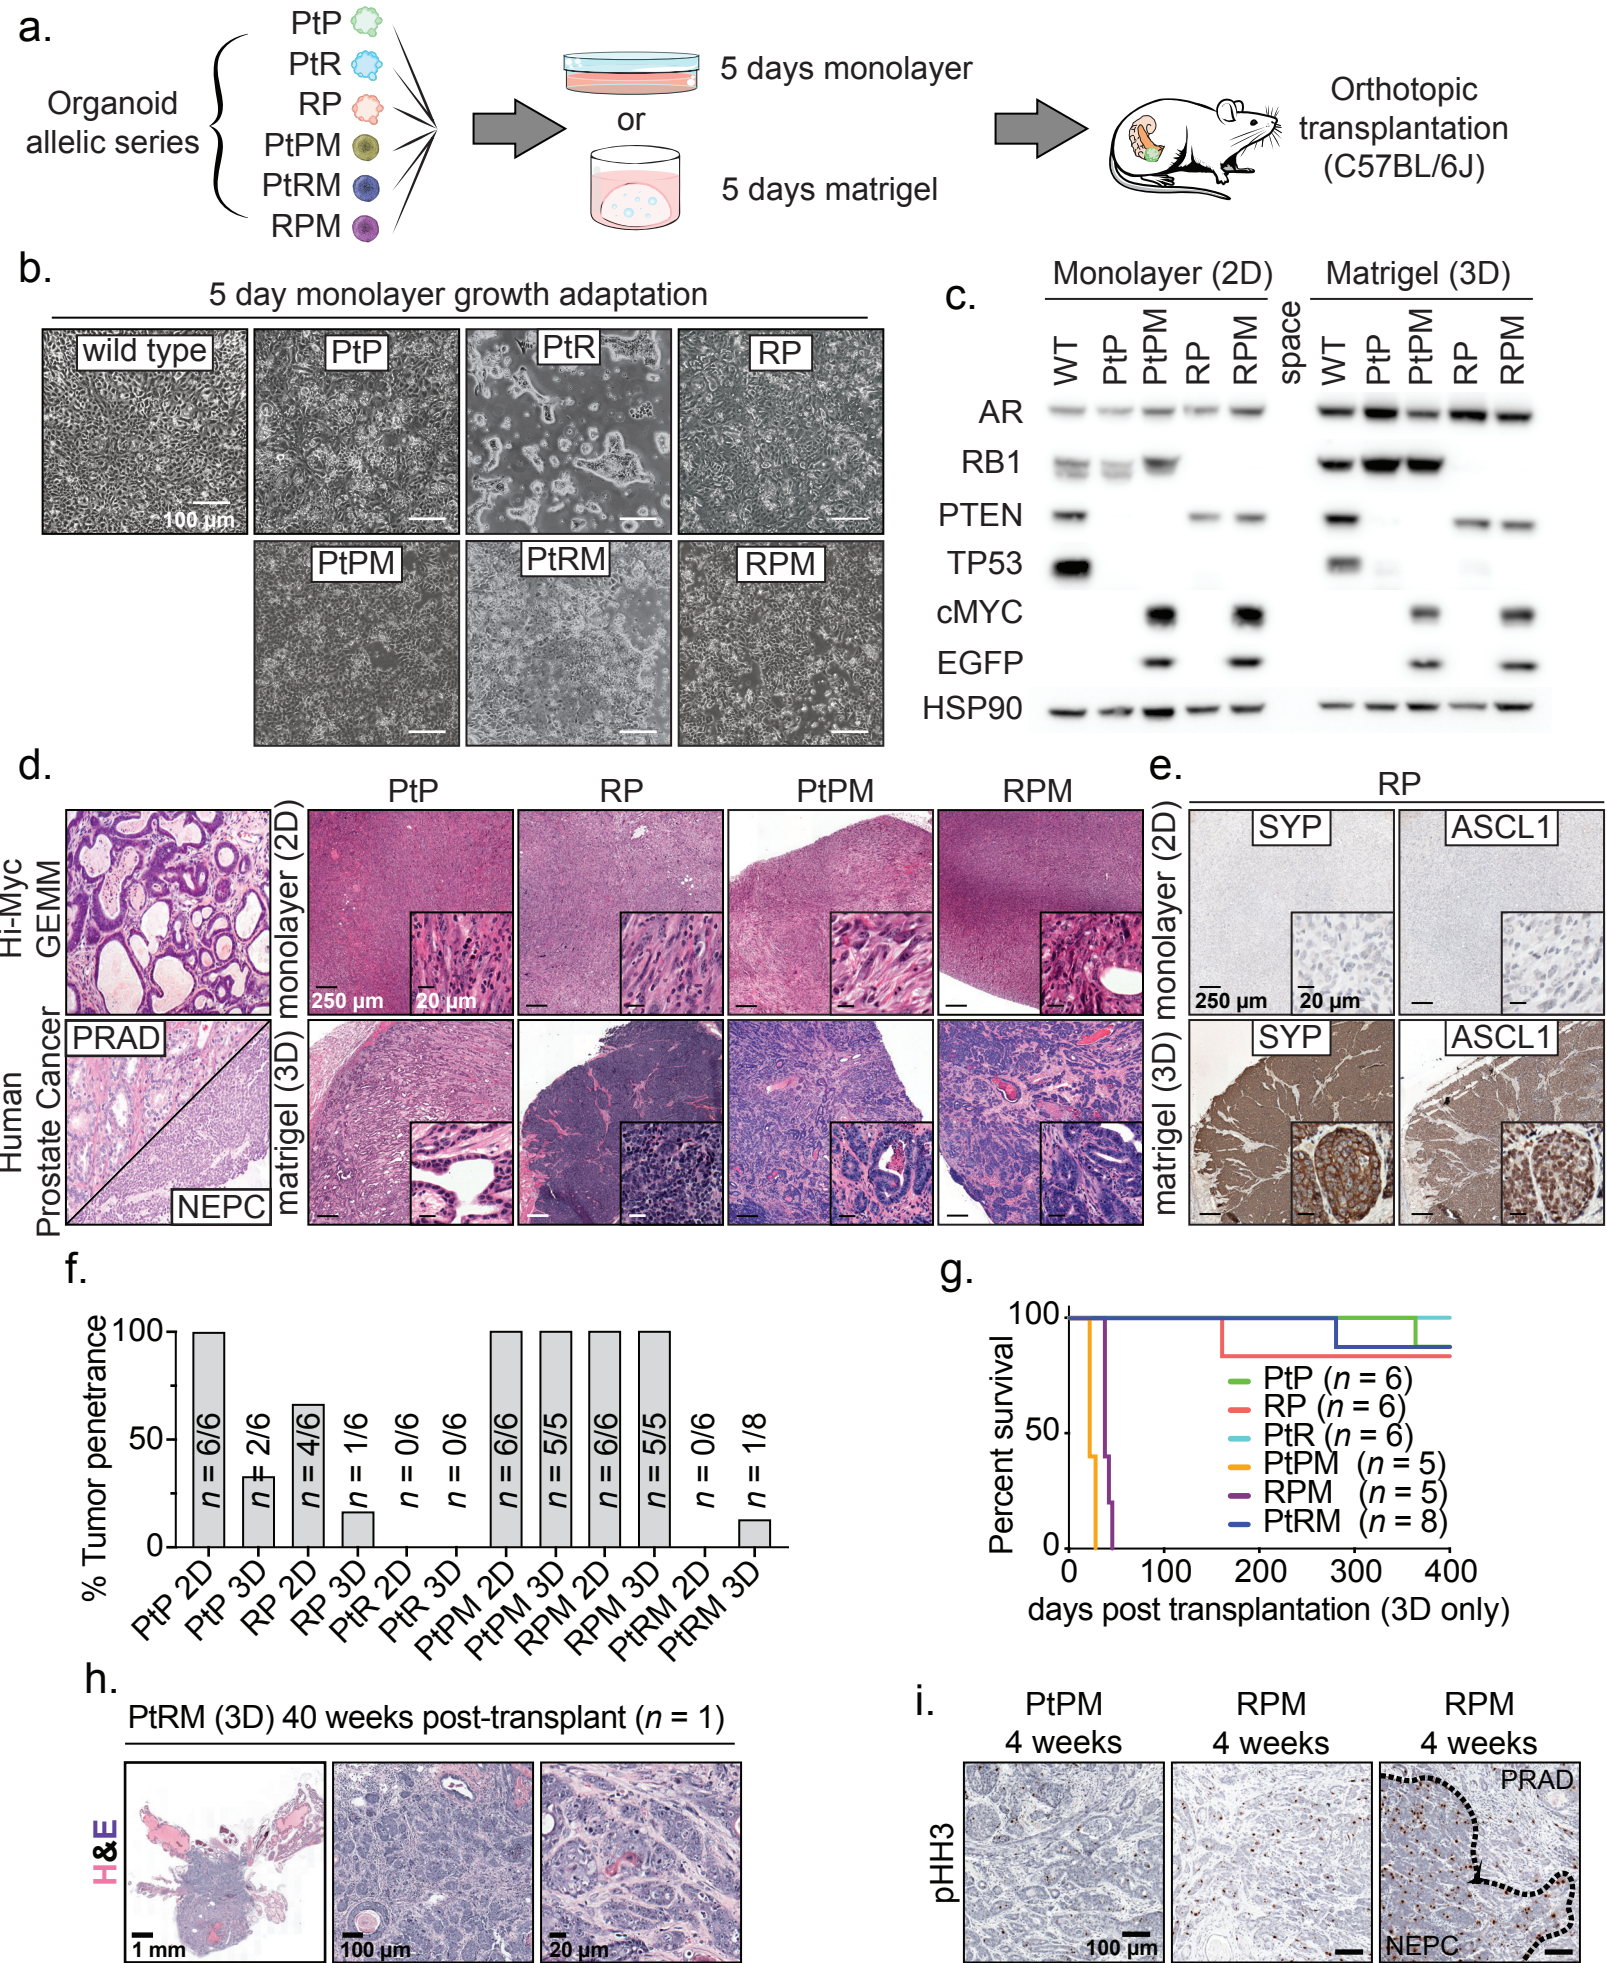

1 **Extended Data Figure 2:**

2 **a.** Schematic representation of steps taken to establish orthotopic prostate tumors in  
3 mice from edited organoids grown in matrigel (3D) or monolayer culture (2D) conditions.  
4 **b.** Representative brightfield images of the indicated organoids seeded in monolayer  
5 growth. Images taken 5 days post seeding. **c.** Western blot validation of knock out  
6 efficiency 5 days post electroporation with Cas9 in complex with purified sgRNA. As in a),  
7 edited organoids were seeded in matrigel or monolayer culture prior to lysis and western  
8 validation. Data representative of 2 independent experiments. **d.** Representative  
9 hematoxylin and eosin stains (low and high magnification images) of established mouse  
10 models (Hi-MYC), human prostate cancer, and organoid orthotopic transplant-derived  
11 prostate tumors. Data related to Extended Data Fig. 2a-c. OT prostate tumors derived  
12 from transplantation of organoids grown in (top) monolayer or (bottom) traditional 3D  
13 matrigel conditions. **e.** Representative Synaptophysin (SYP) or ASCL1  
14 immunohistochemical stains of tumors isolated from mice transplanted with RP organoids  
15 grown in (top) monolayer or (bottom) traditional 3D matrigel conditions. Data  
16 representative of  $n=2$  independent tumors per stain. **f.** Percentage of mice with tumors  
17 per genotype and organoid growth conditions. Sample size per genotype indicated within  
18 the figure panel and represent independently arising prostate tumors. **g.** Survival of mice  
19 OT transplanted with 250k dissociated organoids grown only in matrigel. Sample size per  
20 cohort indicated within the figure legend and are representative of independently arising  
21 tumors. **h.** Representative hematoxylin and eosin (H&E) stains of a single mouse that  
22 developed orthotopic tumors following transplantation of PtRM organoids grown in  
23 matrigel. **i.** Representative phospho-histone H3 immunohistochemical stains of PtPM or  
24 RPM orthotopic prostate tumors. Histological classification performed using serial  
25 sectioned H&E. Dotted line represents the boundary of PRAD and NEPC. Data related to  
26 Fig. 1d. All scale bars denoted within the figure panel.

27  
28  
29  
30  
31  
32  
33  
34  
35  
36  
37  
38  
39  
40



# EXTENDED DATA FIGURE 3:

## Iliac draining lymph node metastases

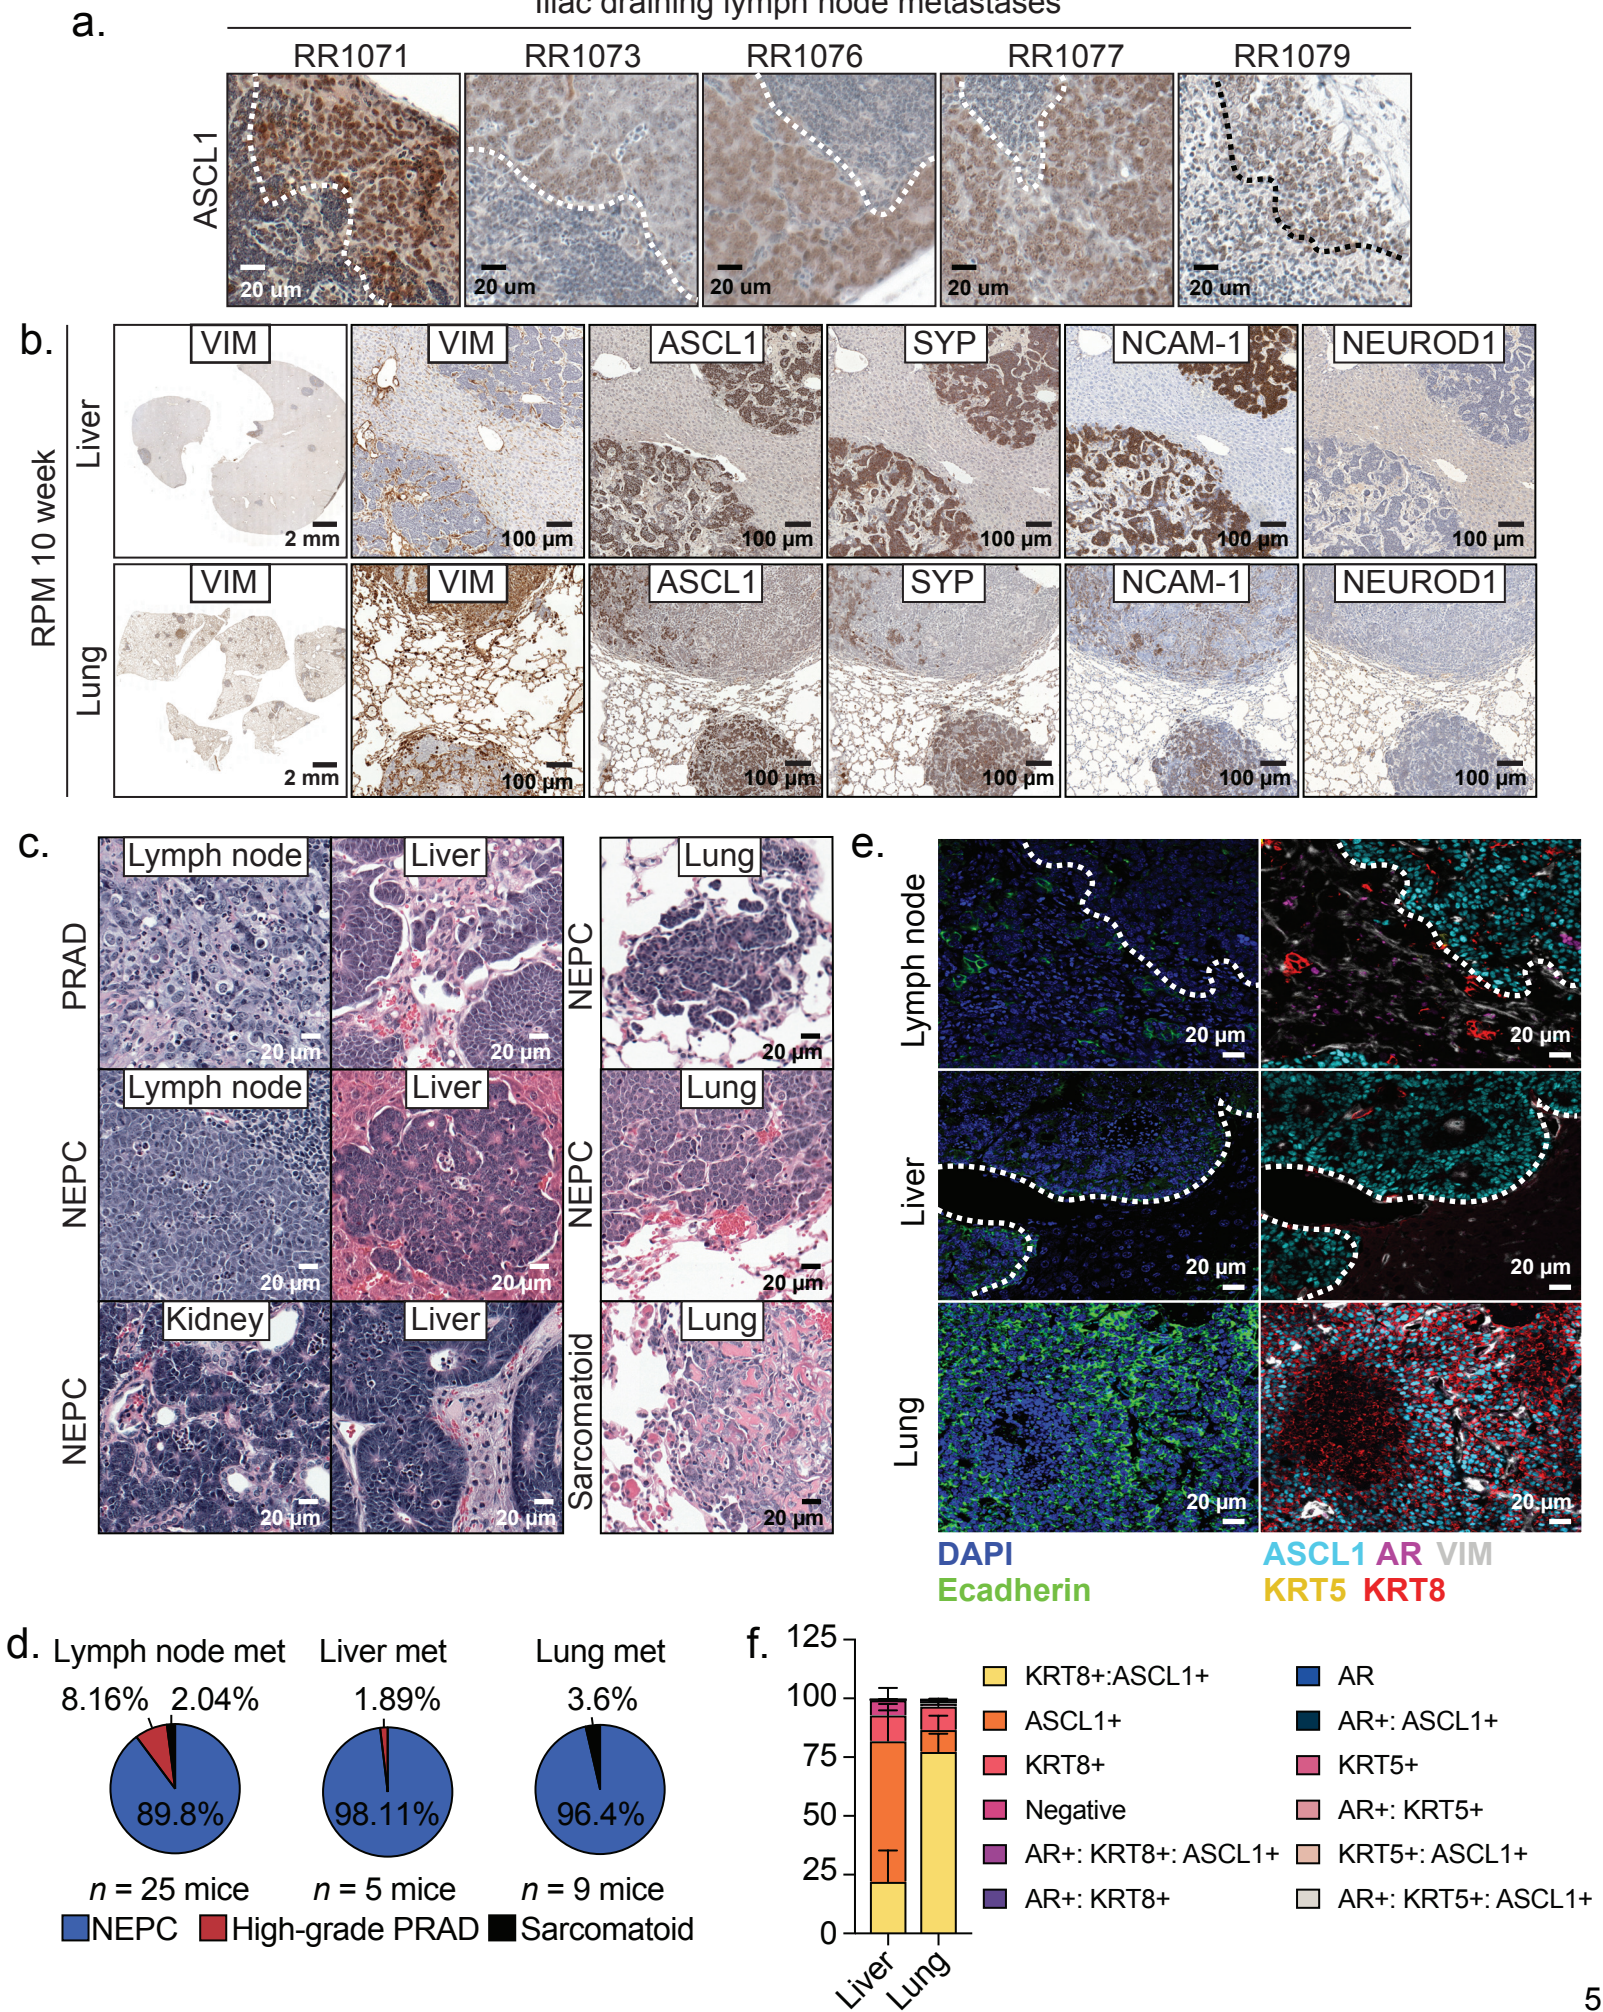



1 **Extended Data Figure 3:**  
2 **a.** Representative ASCL1 immunohistochemical stains from iliac lymph node  
3 metastases isolated from 5 independent RPM OT transplanted mice. Dotted line  
4 represents the boundary of tumor and normal tissue. **b.** Representative serially sectioned  
5 immunohistochemical stains from metastases isolated across (top) liver and (bottom) lung  
6 tissue in RPM OT transplanted mice. Scale bars denoted in figure legend. Data  
7 representative of  $n \leq 5$  independent mice. VIM = VIMENTIN, SYP = SYNAPTOPHYSIN.  
8 **c.** Representative H&E stains and histological grade of metastases isolated from regional  
9 lymph nodes, kidney, liver, and lung tissue from RPM OT transplanted mice. Data related  
10 to Extended Data Fig. 3a-b). Scale bars denoted within the figure panel. Data  
11 representative of  $n \leq 5$  independent mice unless otherwise noted in the figure panel. **d.** Pie  
12 charts demonstrating percentage of mice harboring distinct histotypes of prostate cancer  
13 in the indicated metastatic regions. Sample size denoted in figure panel. **e.**  
14 Representative multiplexed IF staining for lineage markers in metastatic tumors isolated  
15 from regional lymph nodes, liver, and lung tissue from RPM OT transplanted mice. Data  
16 representative of  $n=3$  independent mice. **f.** Percentage of unique cell types expressing  
17 the indicated lineage markers in RPM metastatic samples. Data representative of  $n=3$   
18 independent mice and related to Extended Data Fig. 3e. Error bars denote mean and  
19 standard deviation. All scale bars denoted in the figure panel.

20  
21  
22  
23  
24  
25  
26  
27  
28  
29  
30  
31  
32  
33  
34  
35  
36  
37  
38  
39  
40



# EXTENDED DATA FIGURE 4:

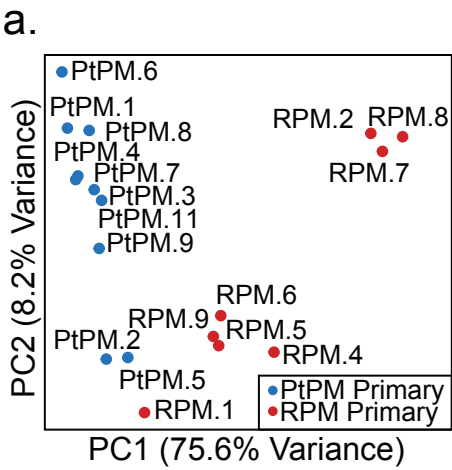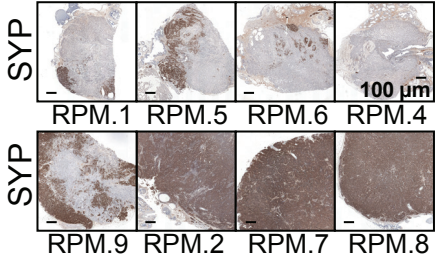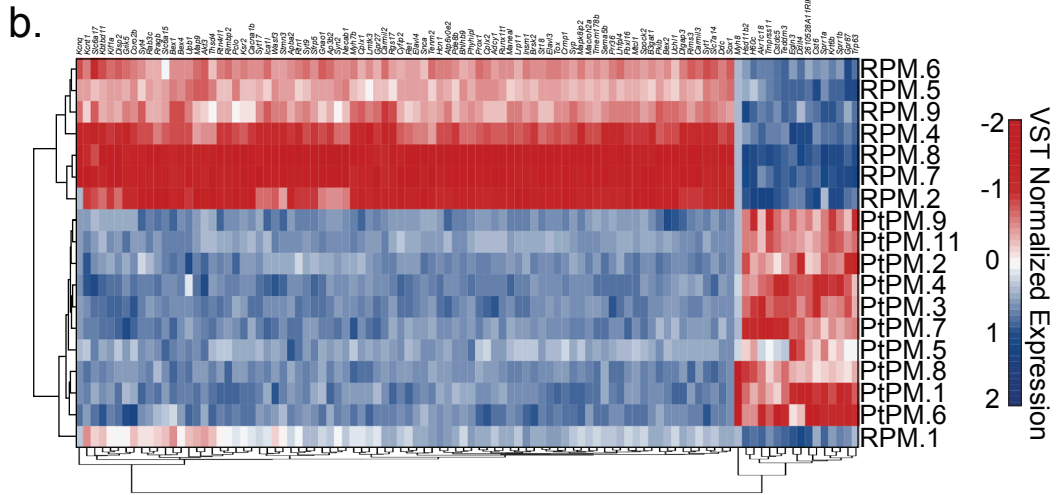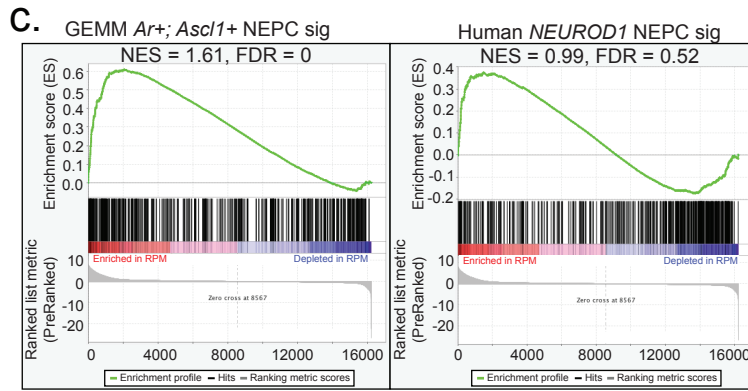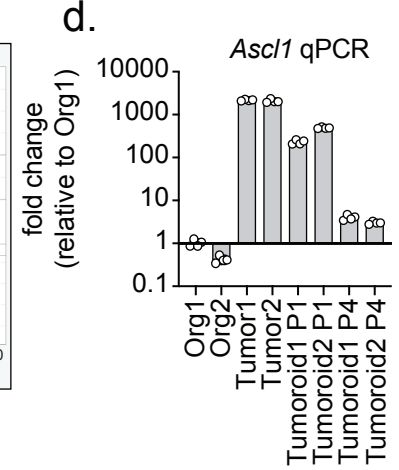

1 **Extended Data Figure 4:**

2 **a.** (Top) Principal component analysis of bulk RNA sequencing data isolated from  
3 RPM or PtPM OT transplants. (Bottom) Representative SYP immunohistochemical stains  
4 from the RPM tumors ordered by increasing percentage of SYP+ cells/tumor. RPM,  $n=8$   
5 independent tumors. PtPM,  $n=10$  independent tumors. Data related figure Fig. 2f. **b.**  
6 Unsupervised hierarchical clustering of variant stabilized transcript normalized  
7 expression of the top 100 differentially expressed genes (columns) within tumors (rows).  
8 Data related figure Fig. 2c. **c.** GSEA enrichment plots of established expression  
9 signatures of (top) genetically engineered mouse model (GEMM) of *AR* and *Ascl1*-co-  
10 expressing NEPC harboring conditional deletion of *Pten*, *Rb1*, and *Trp53* (PtRP), and  
11 (right) histologically verified human NEPC expressing *NEUROD1* within RPM primary  
12 tumors. FDR and NES indicated in the figure. Analysis derived from the transcriptional  
13 profiles of multiple independent RPM tumors ( $n=8$ ) relative to PtPM tumors ( $n=10$ ). Data  
14 related to samples used in Fig. 2c-d. **d.** Quantitative PCR of *Ascl1* transcripts across two  
15 biologically independent RPM organoids (org), tumors, and tumor-derived organoids  
16 (tumoroids) at passage 1 (P1) or passage 4 (P4) post isolation. Each data point indicates  
17 technical quadruplicate values and bars represent mean and standard deviation. Data  
18 representative of 2 independent experiments.

19  
20  
21  
22  
23  
24  
25  
26  
27  
28  
29  
30  
31  
32  
33  
34  
35  
36  
37  
38  
39  
40

# EXTENDED DATA FIGURE 5:

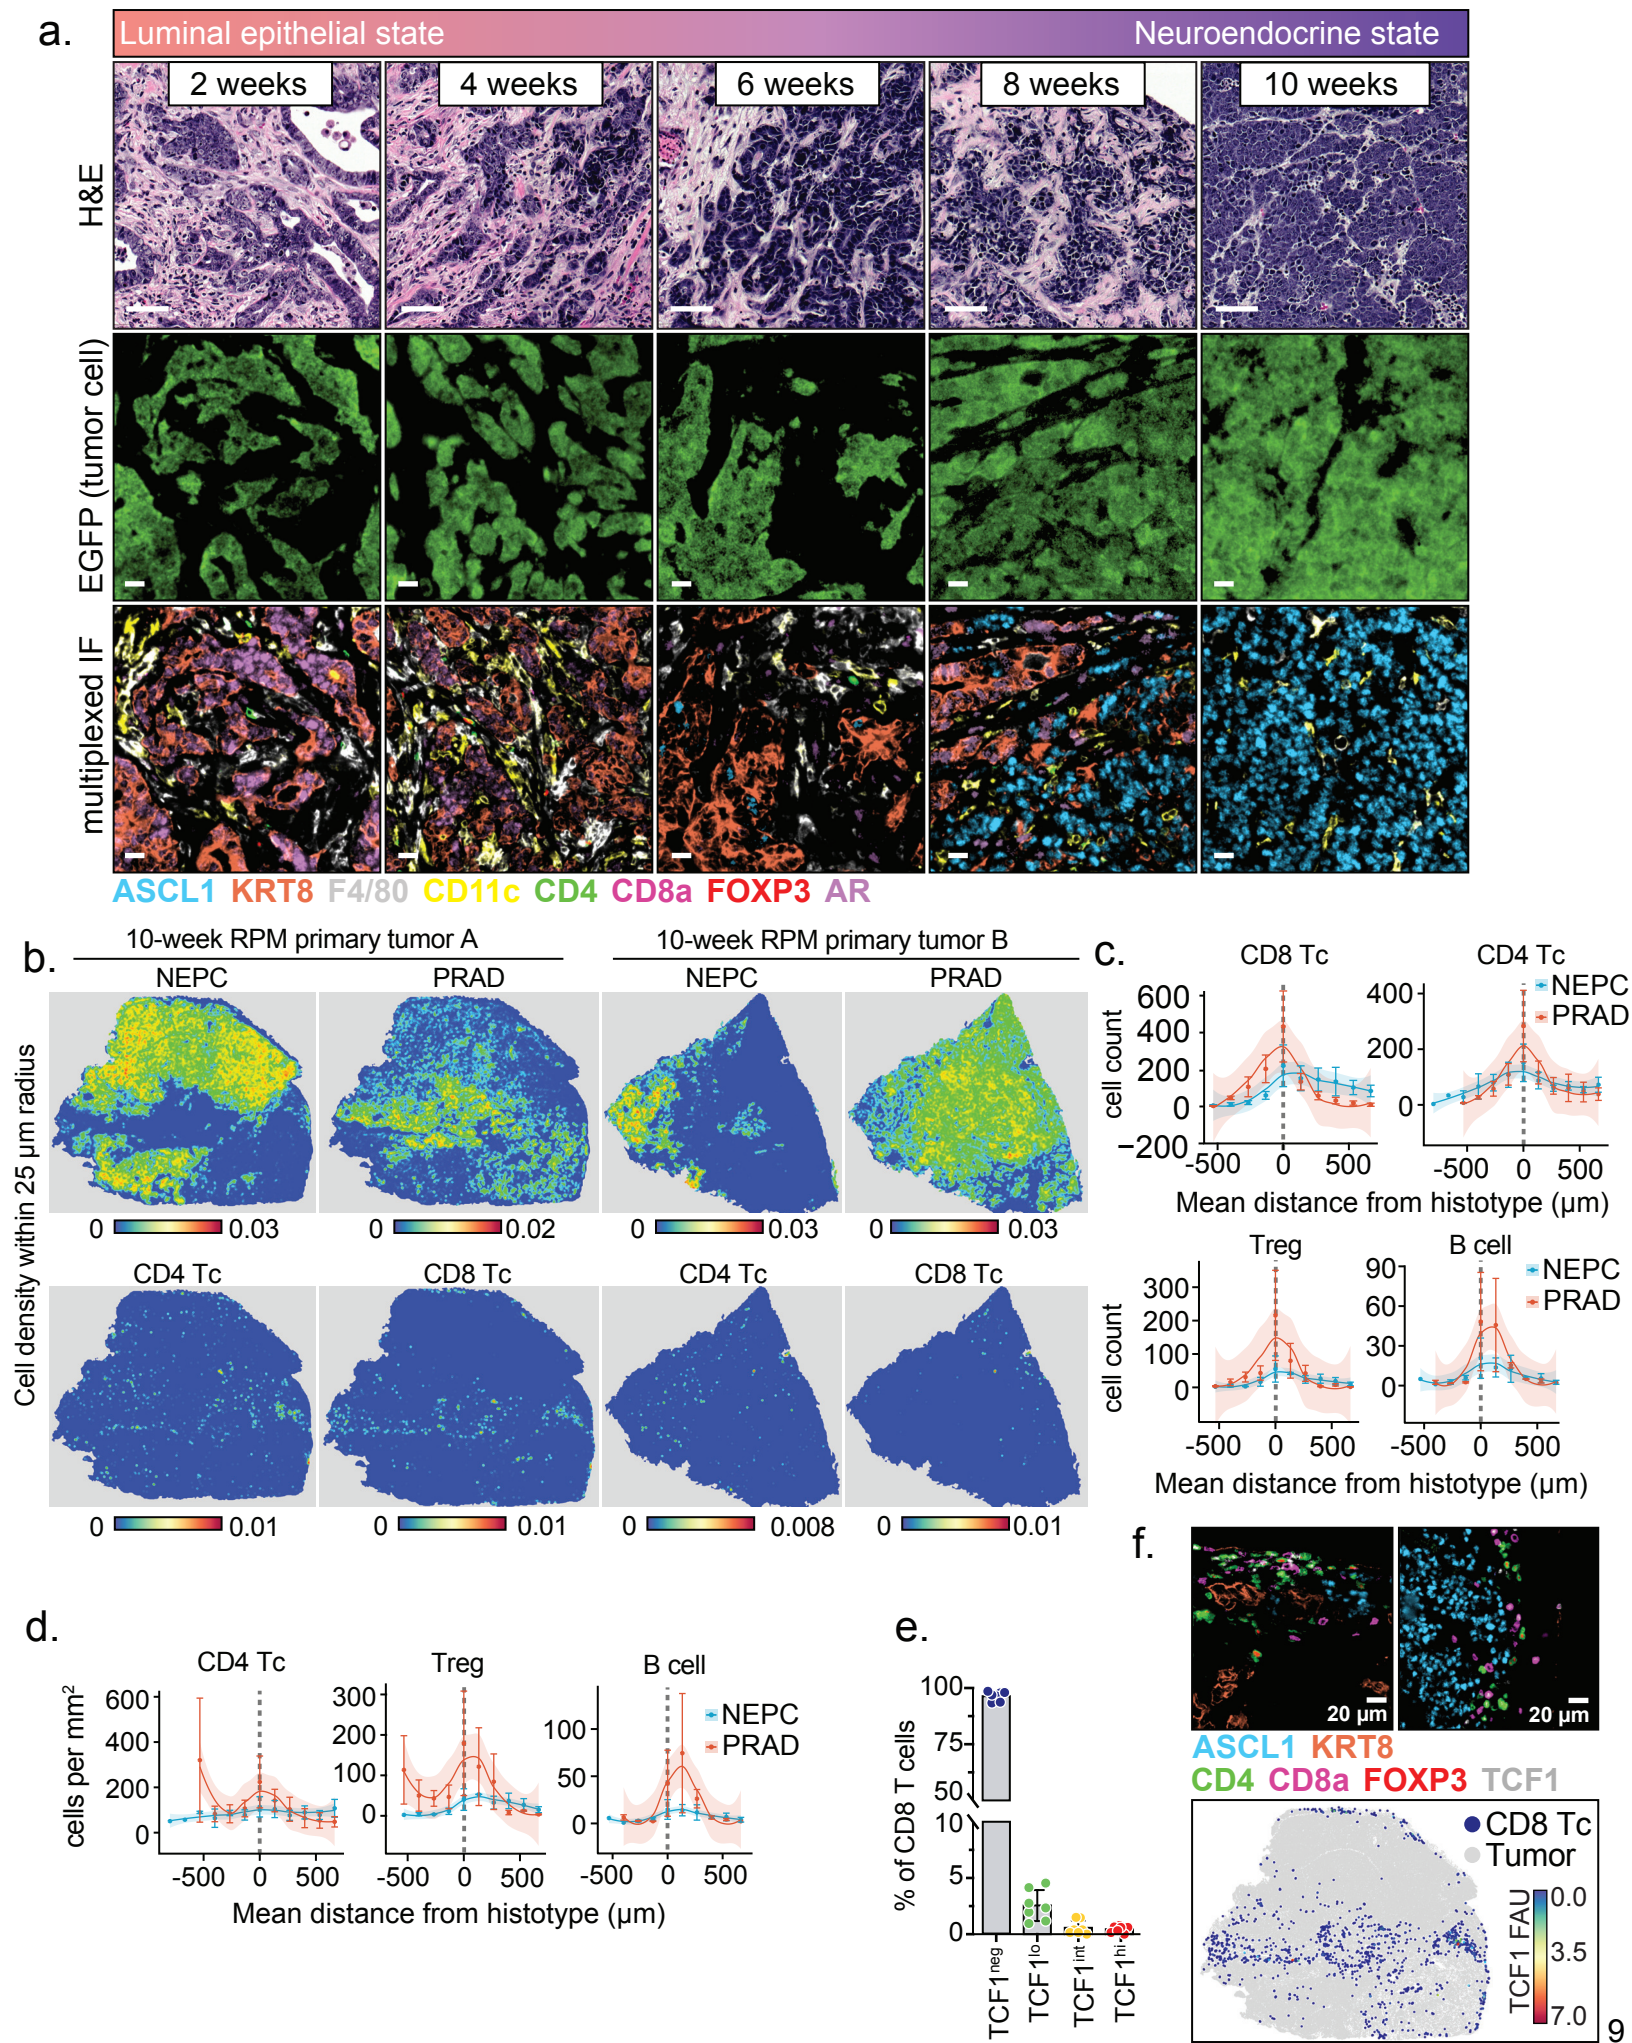

1 **Extended Data Figure 5:**  
2 **a.** Representative (top) H&E, (middle) EGFP, and multicolor immunofluorescence  
3 (bottom) of RPM tumors isolated at the indicated time points. EGFP and  
4 Immunofluorescence images are matched sections. Data representative of  $n>3$  tumors  
5 stained by COMET. Scale bar for all images indicates 20  $\mu\text{m}$ . Pseudo-coloring listed  
6 within the figure panel. **b.** Spatial cell type density (cell density within 25  $\mu\text{m}$  radius) for  
7 the indicated tumor cell types and lymphocytes across two independent 10-week RPM  
8 tumors. Heatmap represents average cell density (cell number/ $\mu\text{m}^2$ ). **c.** Mean lymphocyte  
9 cell count relative to nearest PRAD or NEPC boundary. **d.** Data as in panel c but  
10 normalized to the binned tumor area. **e.** Percentage of TCF1 negative (neg), intermediate  
11 (int), or high (hi) CD8 T cells within  $n=5$  independent RPM tumors. Data points represent  
12 the mean number of indicated CD8 T cells across TCF1 expression groups and error bars  
13 denote standard deviation. **f.** (Top) Representative immunofluorescence stains from RPM  
14 10-week tumors of the indicated lymphocyte markers. (Bottom) Segmented FoV where  
15 each dot represents a CD8 T cell coordinates within a 10-week RPM tumor section. Each  
16 dot is color coded based on predetermined thresholds for TCF1 expression  
17 (FAU=fluorescence arbitrary units). Data representative of  $n=5$  independent tumors and  
18 is related to Extended Data Fig. 5e. Dotted line in panels c-d represents the boundary of  
19 the histotype to a different histotype or the edge of a tumor. Positive values indicate cells  
20 found outside the histotype boundary; negative values indicate cells found inside the  
21 histotype boundary. Data in panels c-d derived from  $n=3$  biologically independent  
22 samples. Error bars denote mean and standard error of the mean. Smoothed data  
23 curve fit by Loess method.  
24  
25  
26  
27  
28  
29  
30  
31  
32  
33  
34  
35  
36  
37  
38  
39  
40



# EXTENDED DATA FIGURE 6:

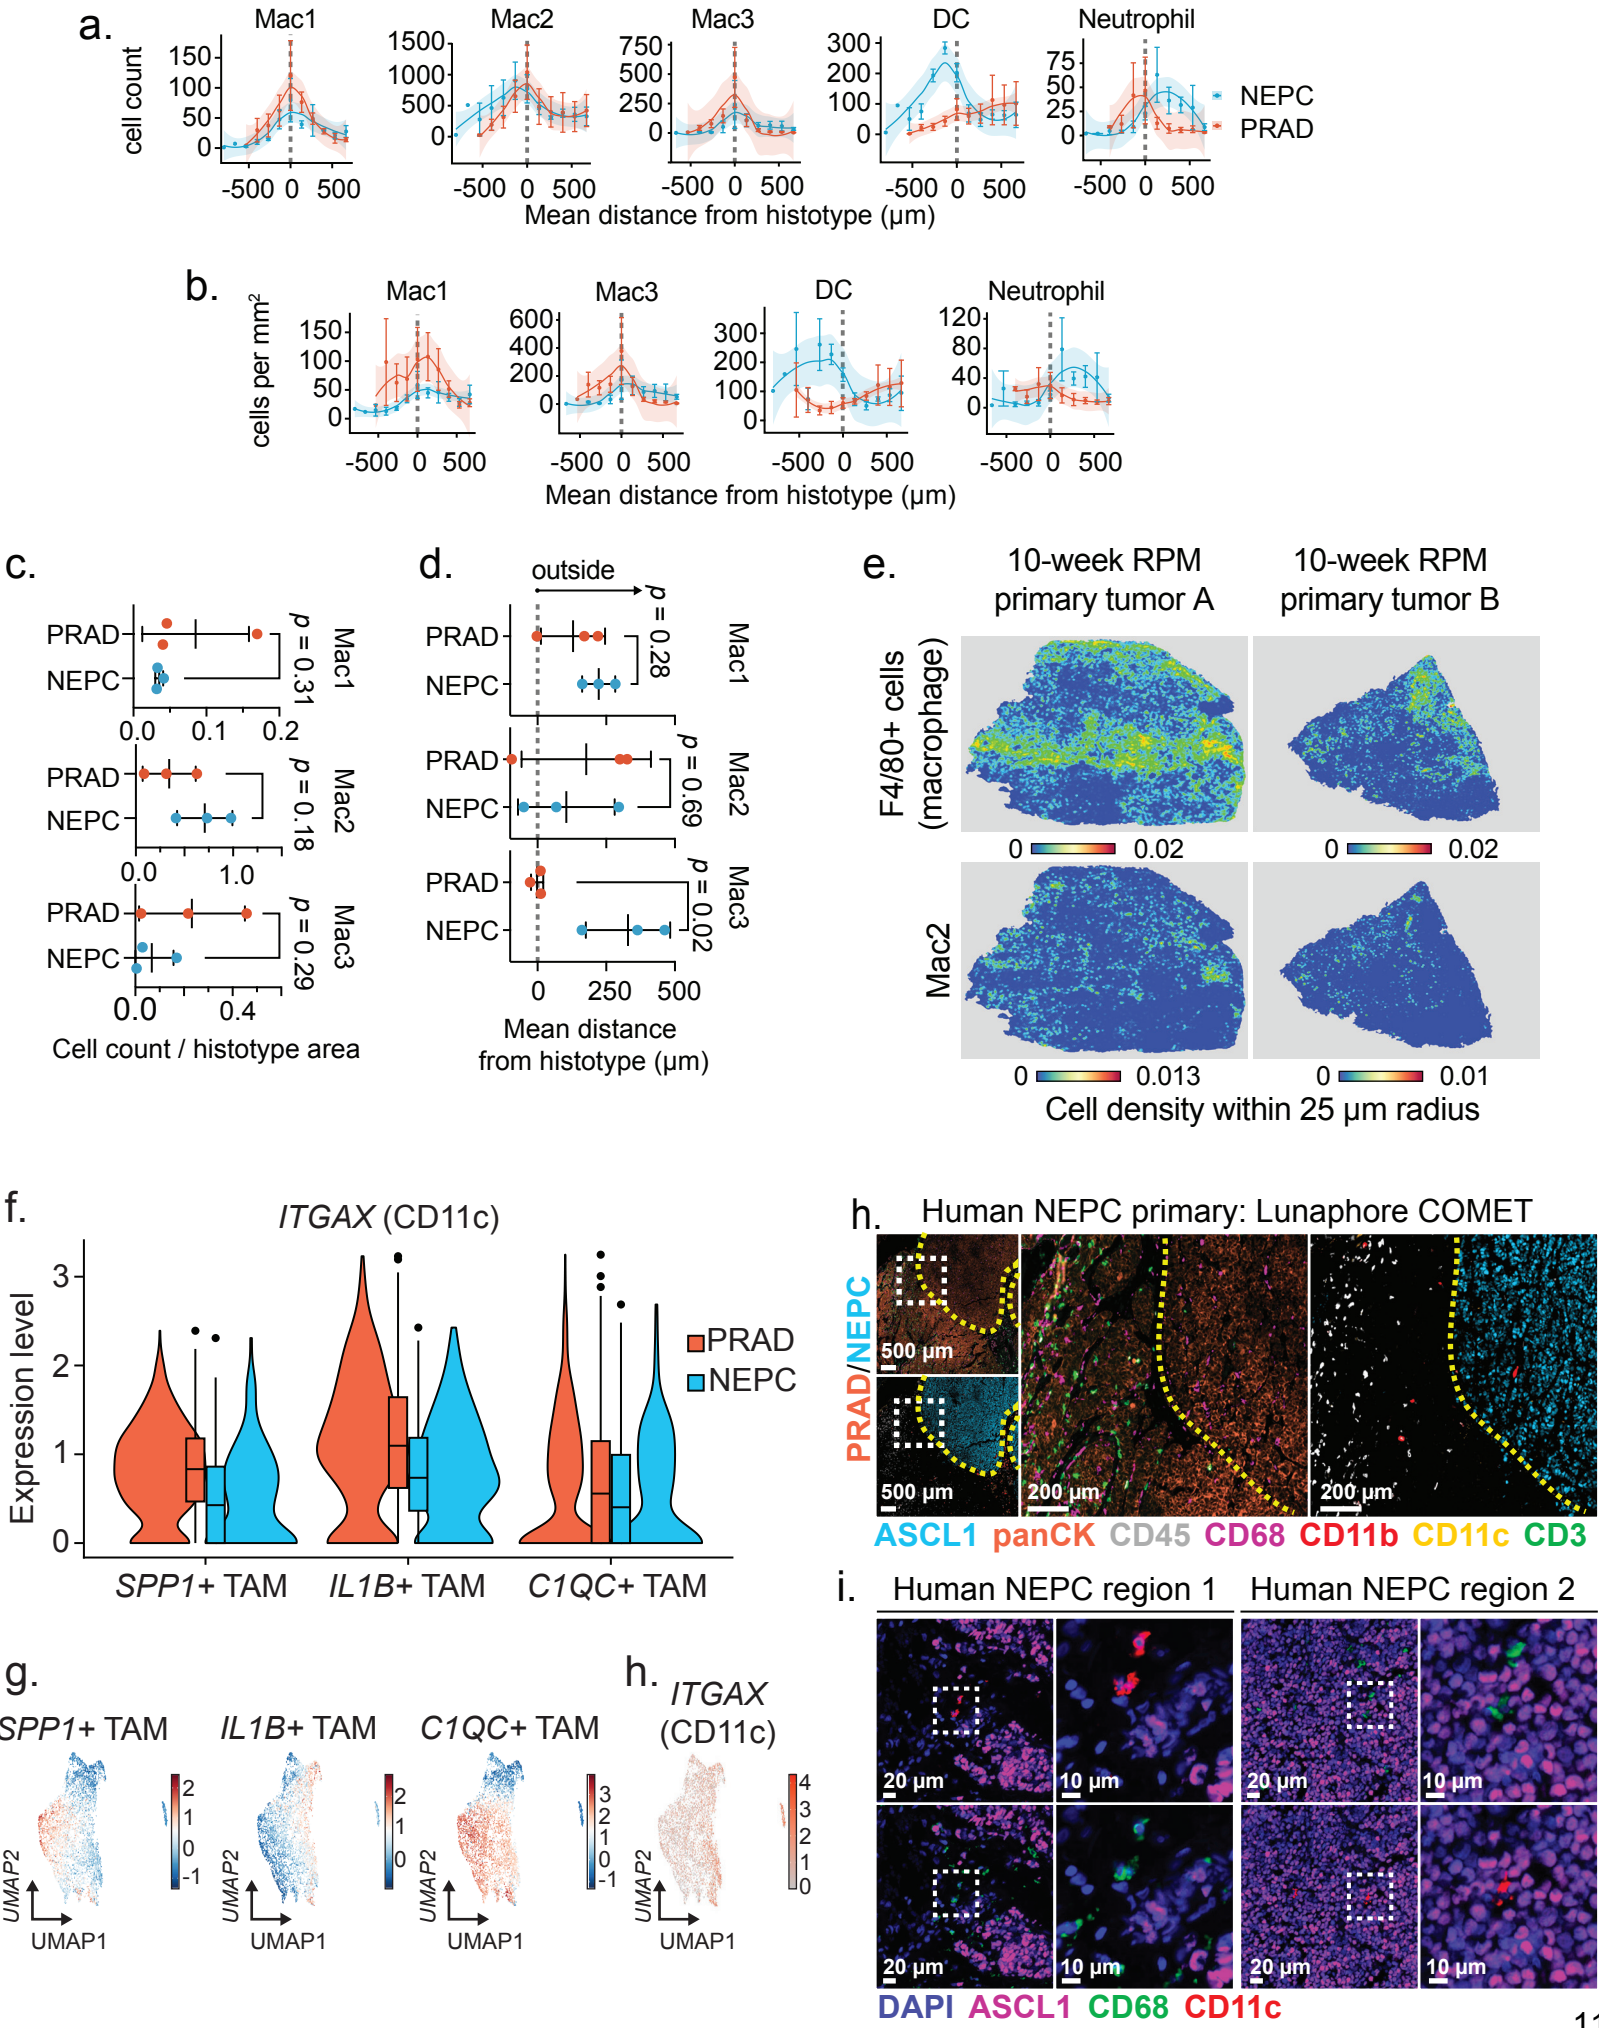

1 **Extended Data Figure 6:**  
2 **a.** Frequency distribution of each indicated cell type within each binned distance  
3 outside or inside the defined interface region (NEPC or PRAD). Error bar denotes mean  
4 and standard error. **b.** Frequency distribution of each indicated cell type density within  
5 each binned distance from defined interface region (NEPC or PRAD). Error bar denotes  
6 mean and standard error. **c.** Dot plot depicting mean cell density away from the boundary  
7 of NEPC or PRAD tumor regions for the indicated macrophage subtypes. Error bar  
8 denotes mean and standard deviation. **d.** Dot plot depicting mean cell distance ( $\mu\text{m}$ ) away  
9 from the boundary of NEPC or PRAD tumor regions for the indicated macrophage  
10 subtypes. Error bar denotes mean and standard deviation. **e.** Spatial cell type density  
11 (cell density within 25- $\mu\text{m}$  radius) for the indicated myeloid cell types across two  
12 independent 10-week RPM tumors. Heatmap represents average cell density (cell  
13 number/ $\mu\text{m}^2$ ). **f.** *ITGAX* (CD11c) expression across previously established tumor-  
14 associated macrophage populations identified within human PRAD and NEPC samples  
15 sequenced by scRNAseq. Violin plot depicts the median and first and third quartiles of  
16 *ITGAX* expression. **g.** Gene expression modules of TAM subsets identified within human  
17 PRAD and NEPC samples displayed in UMAP space, related to Extended Fig. 6f. Scale  
18 bar represents module score. **h.** *ITGAX* (CD11c) expression across all myeloid cell types  
19 identified within human PRAD and NEPC samples displayed in UMAP space, related to  
20 Extended Fig. 6f-g. Scale bar represents raw expression counts. **i.** Representative  
21 multiplexed IF of a human prostatectomy verified to contain mixed PRAD and NEPC  
22 pathology. Left zoomed out panels contain white dotted line indicating zoomed in regions  
23 on the right. Dotted yellow line represents the boundary of a panCK+ PRAD and ASCL1+  
24 NEPC. **j.** Representative multiplexed IF of two distinct regions within the human NEPC  
25 sample shown in Extended Data Fig. 6i. Dotted square indicates magnified inset shown  
26 adjacent to lower magnification view. Dotted line in panels a-d represents the boundary  
27 of the histotype to a different histotype or the edge of a tumor. Positive values indicate  
28 cells found outside the histotype boundary; negative values indicate cells found inside the  
29 histotype boundary. Data in panels a-d derived from  $n=3$  biologically independent  
30 samples. Smoothened data curve fit by Loess method.  
31  
32  
33  
34  
35  
36  
37  
38  
39  
40

# EXTENDED DATA FIGURE 7:

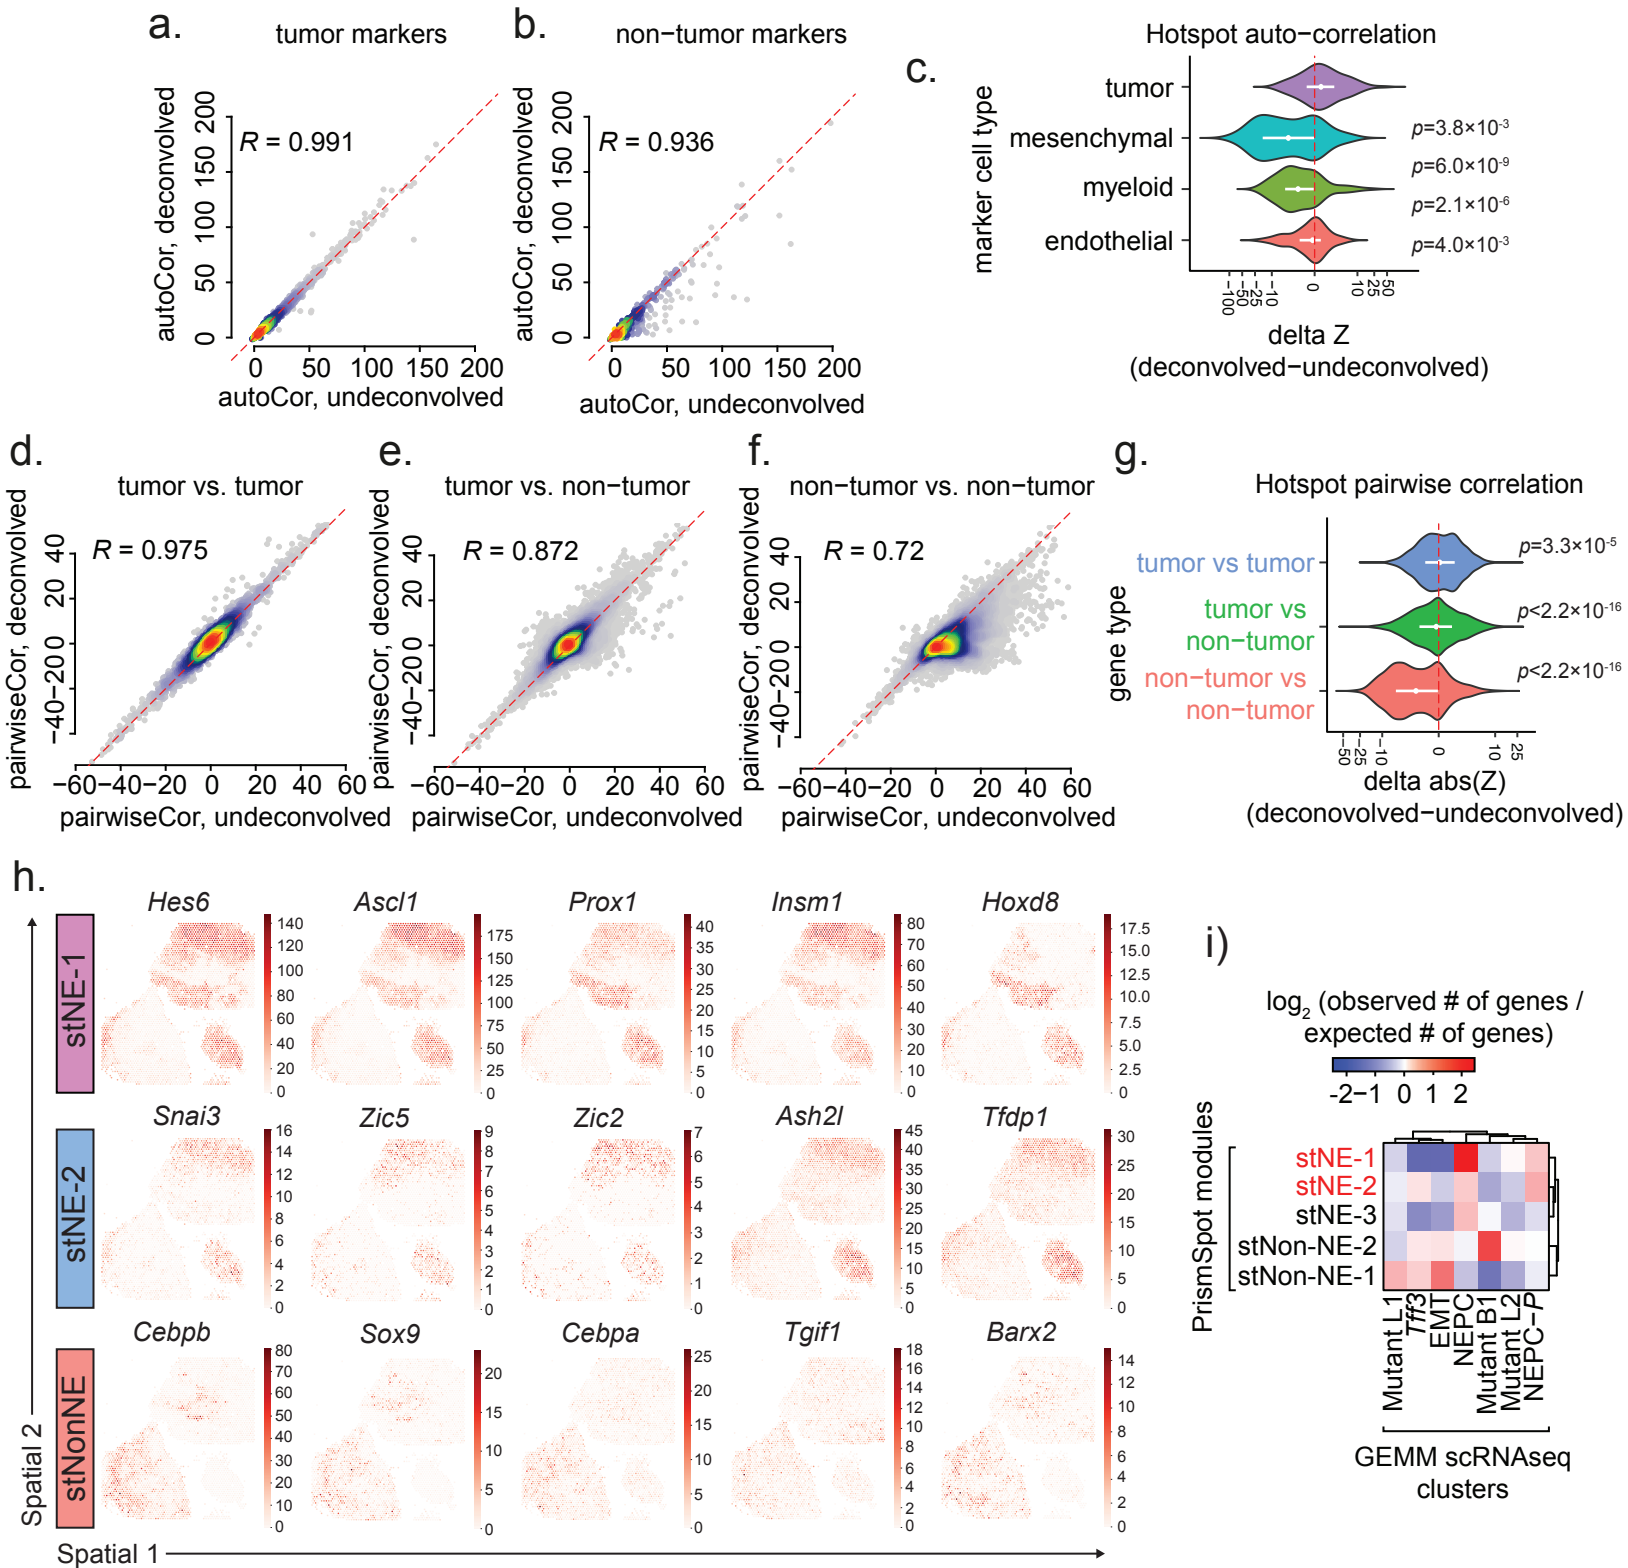

1 **Extended Data Figure 7:**

2 **a.** Density plot shows the Hotspot autocorrelation Z-scores for BayesPrism  
3 deconvolved (y-axis) vs undeconvolved expression (x-axis) across markers of tumor cells  
4 derived from GEMM scRNA-seq. Each dot in the density plot represents a tumor marker  
5 gene. Red dashed line marks  $y=x$ . **b.** Same as panel a. but across non-tumor cell types  
6 derived from GEMM scRNA-seq, including endothelial, myeloid, and mesenchymal cells.  
7 Autocorrelation computed using the deconvolved expression shows smaller value than  
8 that from the undeconvolved expression. **c.** Violin plot shows the distribution of the  
9 difference between Z-scores of PrismSpot and un-deconvolved Hotspot for marker genes  
10 of each cell type. Red dashed line marks zero. **d.** Density plot shows the Hotspot pairwise  
11 local correlation Z-scores for BayesPrism deconvolved (y-axis) vs undeconvolved  
12 expression (x-axis) between pairs of tumor marker genes defined using GEMM scRNA-  
13 seq. Each dot in the density plot represents a pair of tumor marker genes. Red dashed  
14 line marks  $y=x$ . **e.** Same as panel d. but between a tumor marker gene and marker gene  
15 from any non-tumor cell types. Using deconvolved expressions shrinks local correlation  
16 Z-scores towards zero. **f.** Same as panel e. but between a pair of marker genes from any  
17 non-tumor cell types. Using deconvolved expressions shrinks local correlation Z-scores  
18 towards zero. **g.** Violin plot shows the distribution of the difference between the absolute  
19 value of Z-scores of PrismSpot and un-deconvolved Hotspot for genes of each category.  
20 Red dashed line marks zero. **h.** Spatial expression (Visium) across the indicated tumor  
21 spatial modules identified by PrismSpot (related to Fig. 5e-f). Scale bar represents raw  
22 expression counts. **i.** Heatmap of the observed gene overlap normalized to expected  
23 gene overlap between PrismSpot modules and several tumor clusters derived by  
24 previously published GEMM models of NEPC.

25  
26  
27  
28  
29  
30  
31  
32  
33  
34  
35  
36  
37  
38  
39  
40





1 **Extended Data Figure 8:**

2 **a.** Individual longitudinal SQ tumor volumes as determined by caliper. Castration or  
3 sham surgery was performed 14 days post organoid transplantation. Data related to Fig.  
4 6b.  $n=6$  independent tumors across each group. Related to Fig. 6b. **b.** Final SQ tumor  
5 mass at experimental endpoint.  $n=6$  independent tumors across each group. Statistics  
6 derived by one-way ANOVA with Sidak's multiple comparisons correction. Error bars  
7 denote mean and standard deviation. **c.** Individual longitudinal OT tumor volumes  
8 determined by ultrasound.  $n=6$  independent tumors per group. Castration or sham  
9 surgery was performed 14 days post organoid transplantation. **d.** Final OT prostate tumor  
10 volumes determined by ultrasound. *Ascl1<sup>wt</sup>* intact  $n=5$ ; *Ascl1<sup>wt</sup>* castrate  $n=3$ ; *Ascl1<sup>KO</sup>* intact  
11  $n=5$ ; *Ascl1<sup>KO</sup>* castrate  $n=6$ . Statistics derived by one-way ANOVA with Sidak's multiple  
12 comparisons correction. Error bars denote mean and standard deviation. **e.** Bar charts  
13 representing percentage of SQ tumor area composed of the histological categories  
14 depicted in the figure legend. Data related to Fig. 6e. Each dot represents the average  
15 area per mouse. Statistics derived by two-way ANOVA with Tukey's multiple comparisons  
16 correction. Error bar denotes mean and standard deviation.  $n=6$  independent tumors per  
17 group. **f.** Bar charts representing percentage of OT tumor area composed of the  
18 histological categories depicted in the figure legend. Data related to Fig. 6f. Each dot  
19 represents the average area per mouse. Statistics derived by two-way ANOVA with  
20 Tukey's multiple comparisons correction. Error bar denotes mean and standard deviation.  
21  $n=6$  independent tumors per group. **g.** Final OT tumor mass at experimental end point.  
22  $n=6$  per group. Statistics derived by one-way ANOVA. Error bars denote mean and  
23 standard deviation. Data related to Extended Data Fig. 8c; however, after cessation of  
24 ultrasound measurements, tumors were isolated and weighed once palpable or distress  
25 was observed. **h.** (Left) schematic of SQ transplantation assay by which mice are  
26 randomized into vehicle or degarelix treatment arms after tumors have established as  
27 determined by caliper. RPM-*Ascl1<sup>WT</sup>* vehicle and degarelix treated  $n=8$ , RPM-*Ascl1<sup>KO</sup>*  
28 vehicle  $n=9$ , RPM-*Ascl1<sup>KO</sup>* degarelix  $n=8$  independent tumors per group. **i.** Survival of  
29 vehicle or degarelix treated mice with SQ transplants of the indicated RPM organoid  
30 genotypes. Statistics derived from the Log-rank (Mantel-Cox) test for each pair-wise  
31 comparison. Data related to Fig. 6c and Extended Data Fig. 8h. RPM-*Ascl1<sup>WT</sup>* vehicle  
32  $n=9$ , RPM-*Ascl1<sup>WT</sup>* degarelix  $n=6$ , RPM-*Ascl1<sup>KO</sup>* vehicle  $n=9$ , and RPM-*Ascl1<sup>KO</sup>* degarelix  
33  $n=8$  independent mice. **j.** Representative (left) hematoxylin and eosin stain and (right)  
34 immunohistochemistry of EGFP of a single RPM-*Ascl1<sup>KO</sup>* tumor growth in a castrated host  
35 demonstrating chondrosarcomatoid histopathology. Scale bars denoted within the figure.  
36 **k.** (Left) Stacked bar charts representing percentage of SQ tumor area composed of the  
37 histological categories depicted in the figure legend. Data are quantified histology of RPM  
38 tumors derived from tumor bearing mice treated with vehicle ( $n=5$ ) or degarelix ( $n=4$ ) for  
39 4 weeks after tumor establishment ( $\geq 150 \text{ mm}^3$ ) and represent average tumor area. (Right)  
40 Stacked bar charts of the percentage of AR- and ASCL1-pos (positive) or neg (negative)

1 tumor cells (defined as EGFP+; CD45-; VIMENTIN-) within vehicle or degarelix treated  
2 RPM SQ tumors. Vehicle  $n=5$ , Degarelix  $n=4$ .

3  
4  
5  
6  
7  
8  
9  
10  
11  
12  
13  
14  
15  
16  
17  
18  
19  
20  
21  
22  
23  
24  
25  
26  
27  
28  
29  
30  
31  
32  
33  
34  
35  
36  
37  
38  
39  
40

# EXTENDED DATA FIGURE 9:

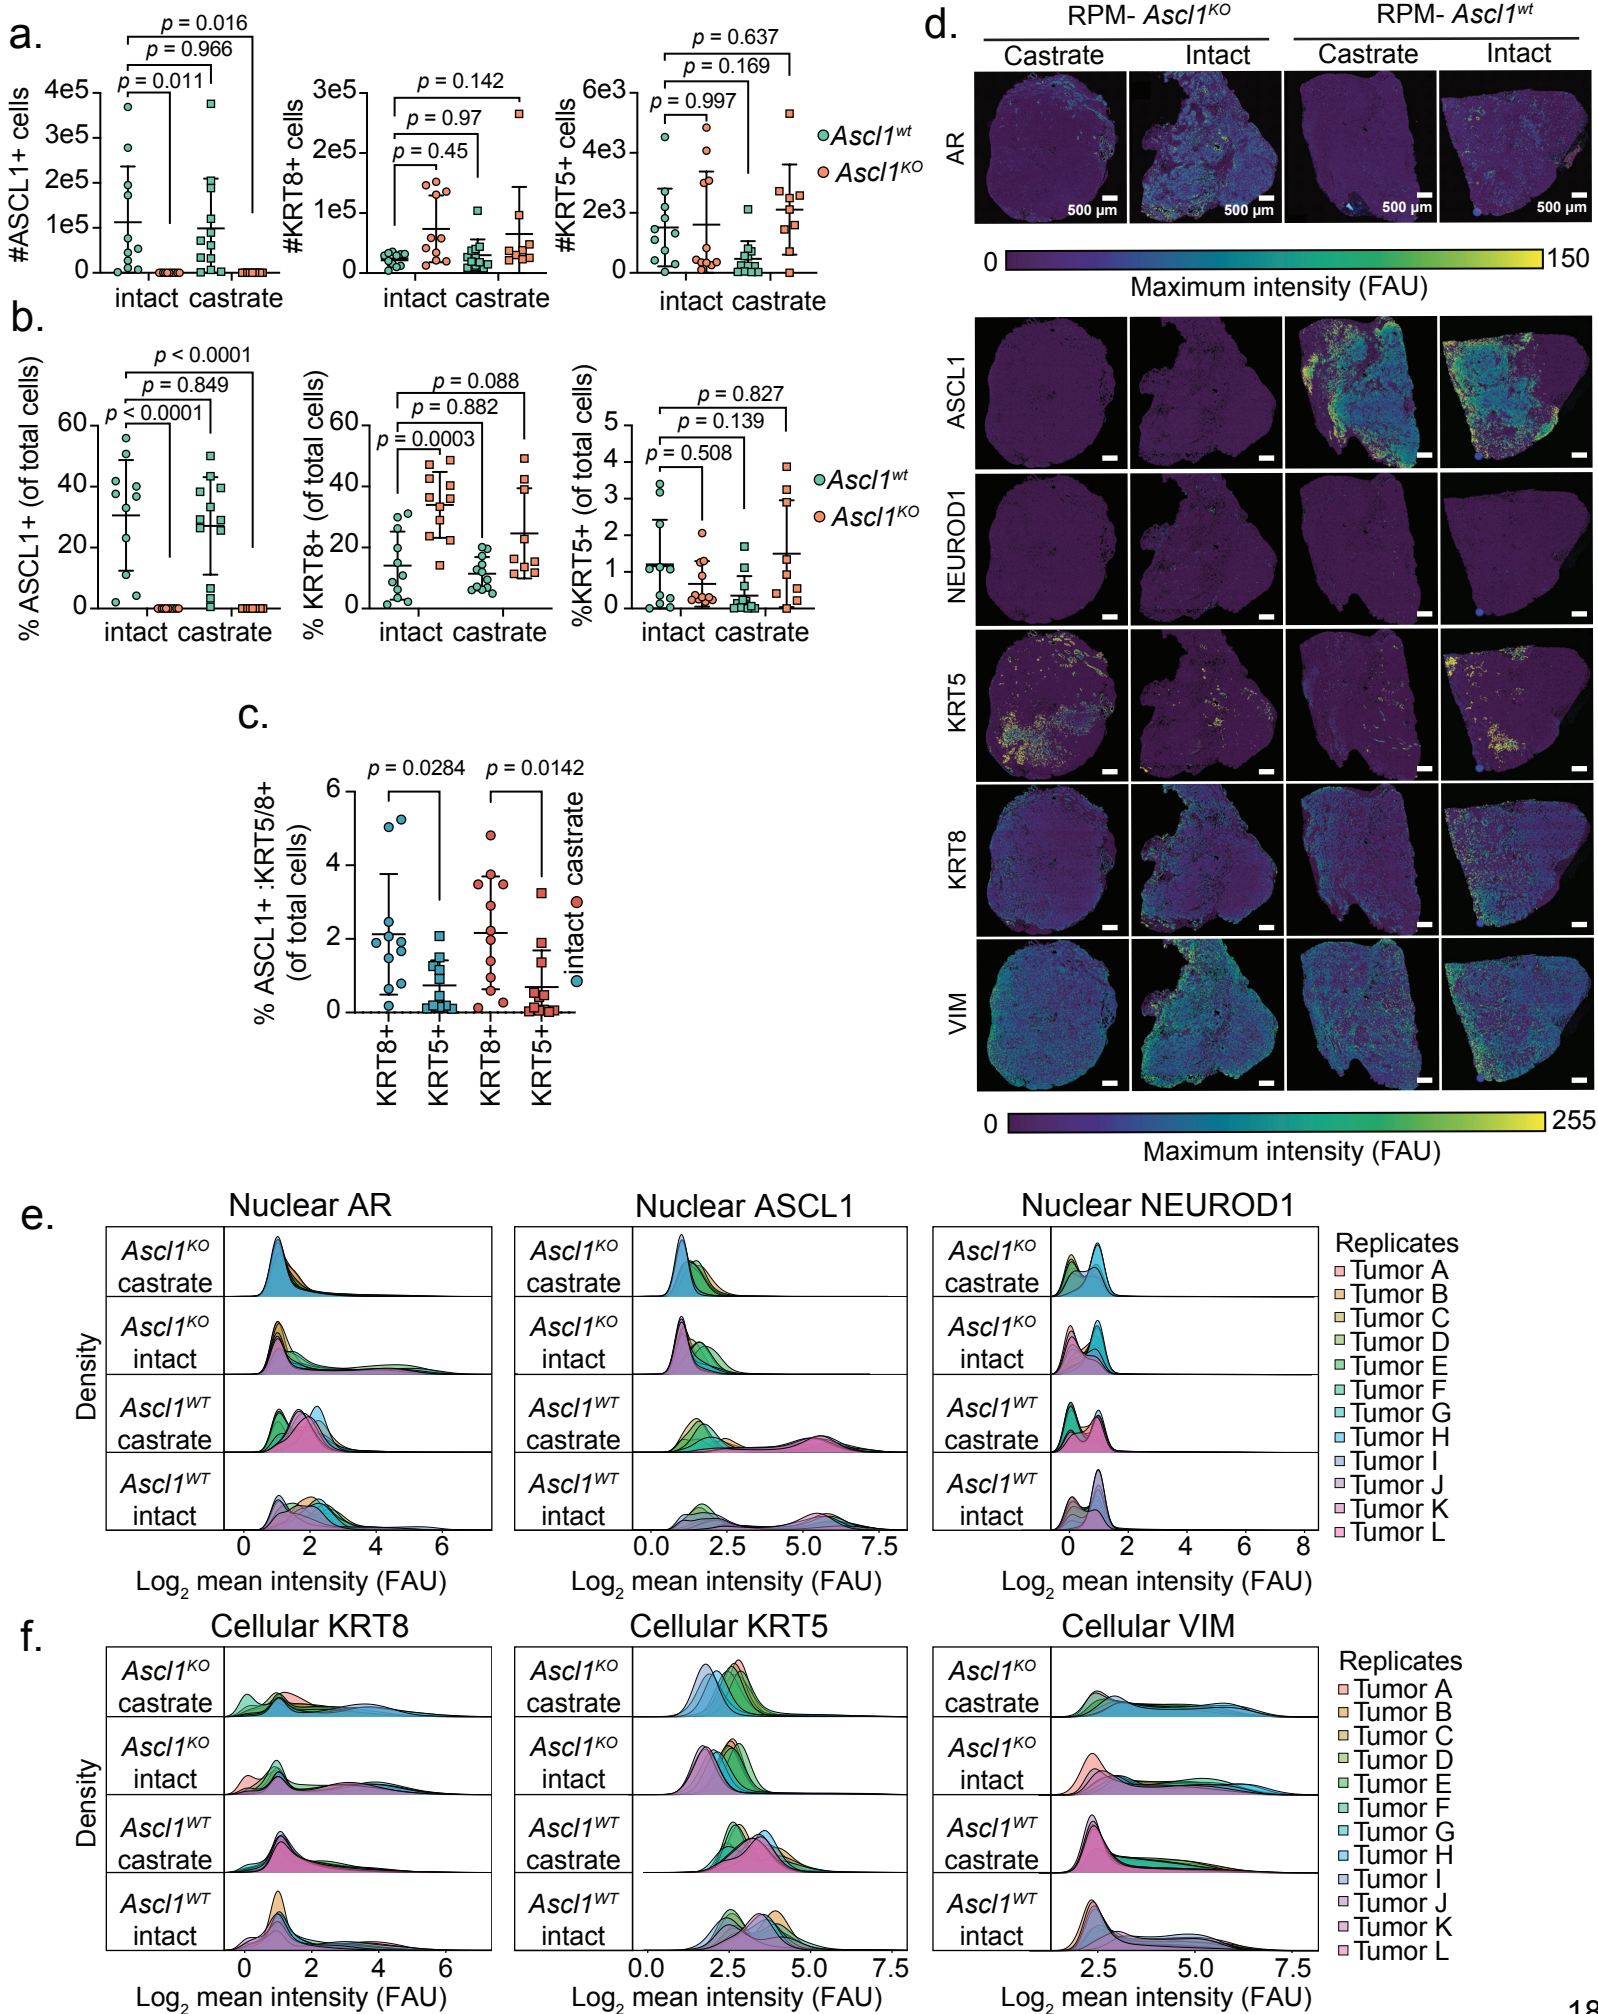



1 **Extended Data Figure 9:**

2 **a.** Number of ASCL1+ nuclei (left), KRT8+ cells (middle) and KRT5+ cells (right) in  
3 the indicated genotypes (legend on right hand-side) and treatment groups. **b.** Percentage  
4 of ASCL1+ nuclei (left), KRT8+ cells (middle) and KRT5+ cells (right) relative to total cells  
5 (DAPI+ nuclei) in the indicated genotypes (legend on right hand-side) and treatment  
6 groups. **c.** Percentage of ASCL1+ cells (DAPI+ nuclei) co-expressing either KRT8 or  
7 KRT5 within RPM-*Ascl1*<sup>WT</sup> tumors in either intact or castrated hosts. Statistics in panels  
8 a-c derived from two-way ANOVA with Tukey's multiple comparisons correction. Error  
9 bars in panels a-c denote mean and standard deviation. **d.** Field of view images depicting  
10 maximum intensity score for all segmented cells within representative RPM tumors of the  
11 indicated genotype and treatment group. FAU=fluorescence arbitrary units. Data  
12 representative of n≥10 individual tumors. **e.** Density plots of the log<sub>2</sub>(x+1) transformed  
13 mean fluorescence intensity for each nuclear protein. Each density plot represents signal  
14 intensity of tumor cells across an independent tumor. **f.** Density plots of the log<sub>2</sub>(x+1)  
15 transformed mean fluorescence intensity for each cytoplasmic protein. Each density plot  
16 represents signal intensity of tumor cells across an independent tumor.

17  
18  
19  
20  
21  
22  
23  
24  
25  
26  
27  
28  
29  
30  
31  
32  
33  
34  
35  
36  
37  
38  
39  
40

EXTENDED DATA FIGURE 10:

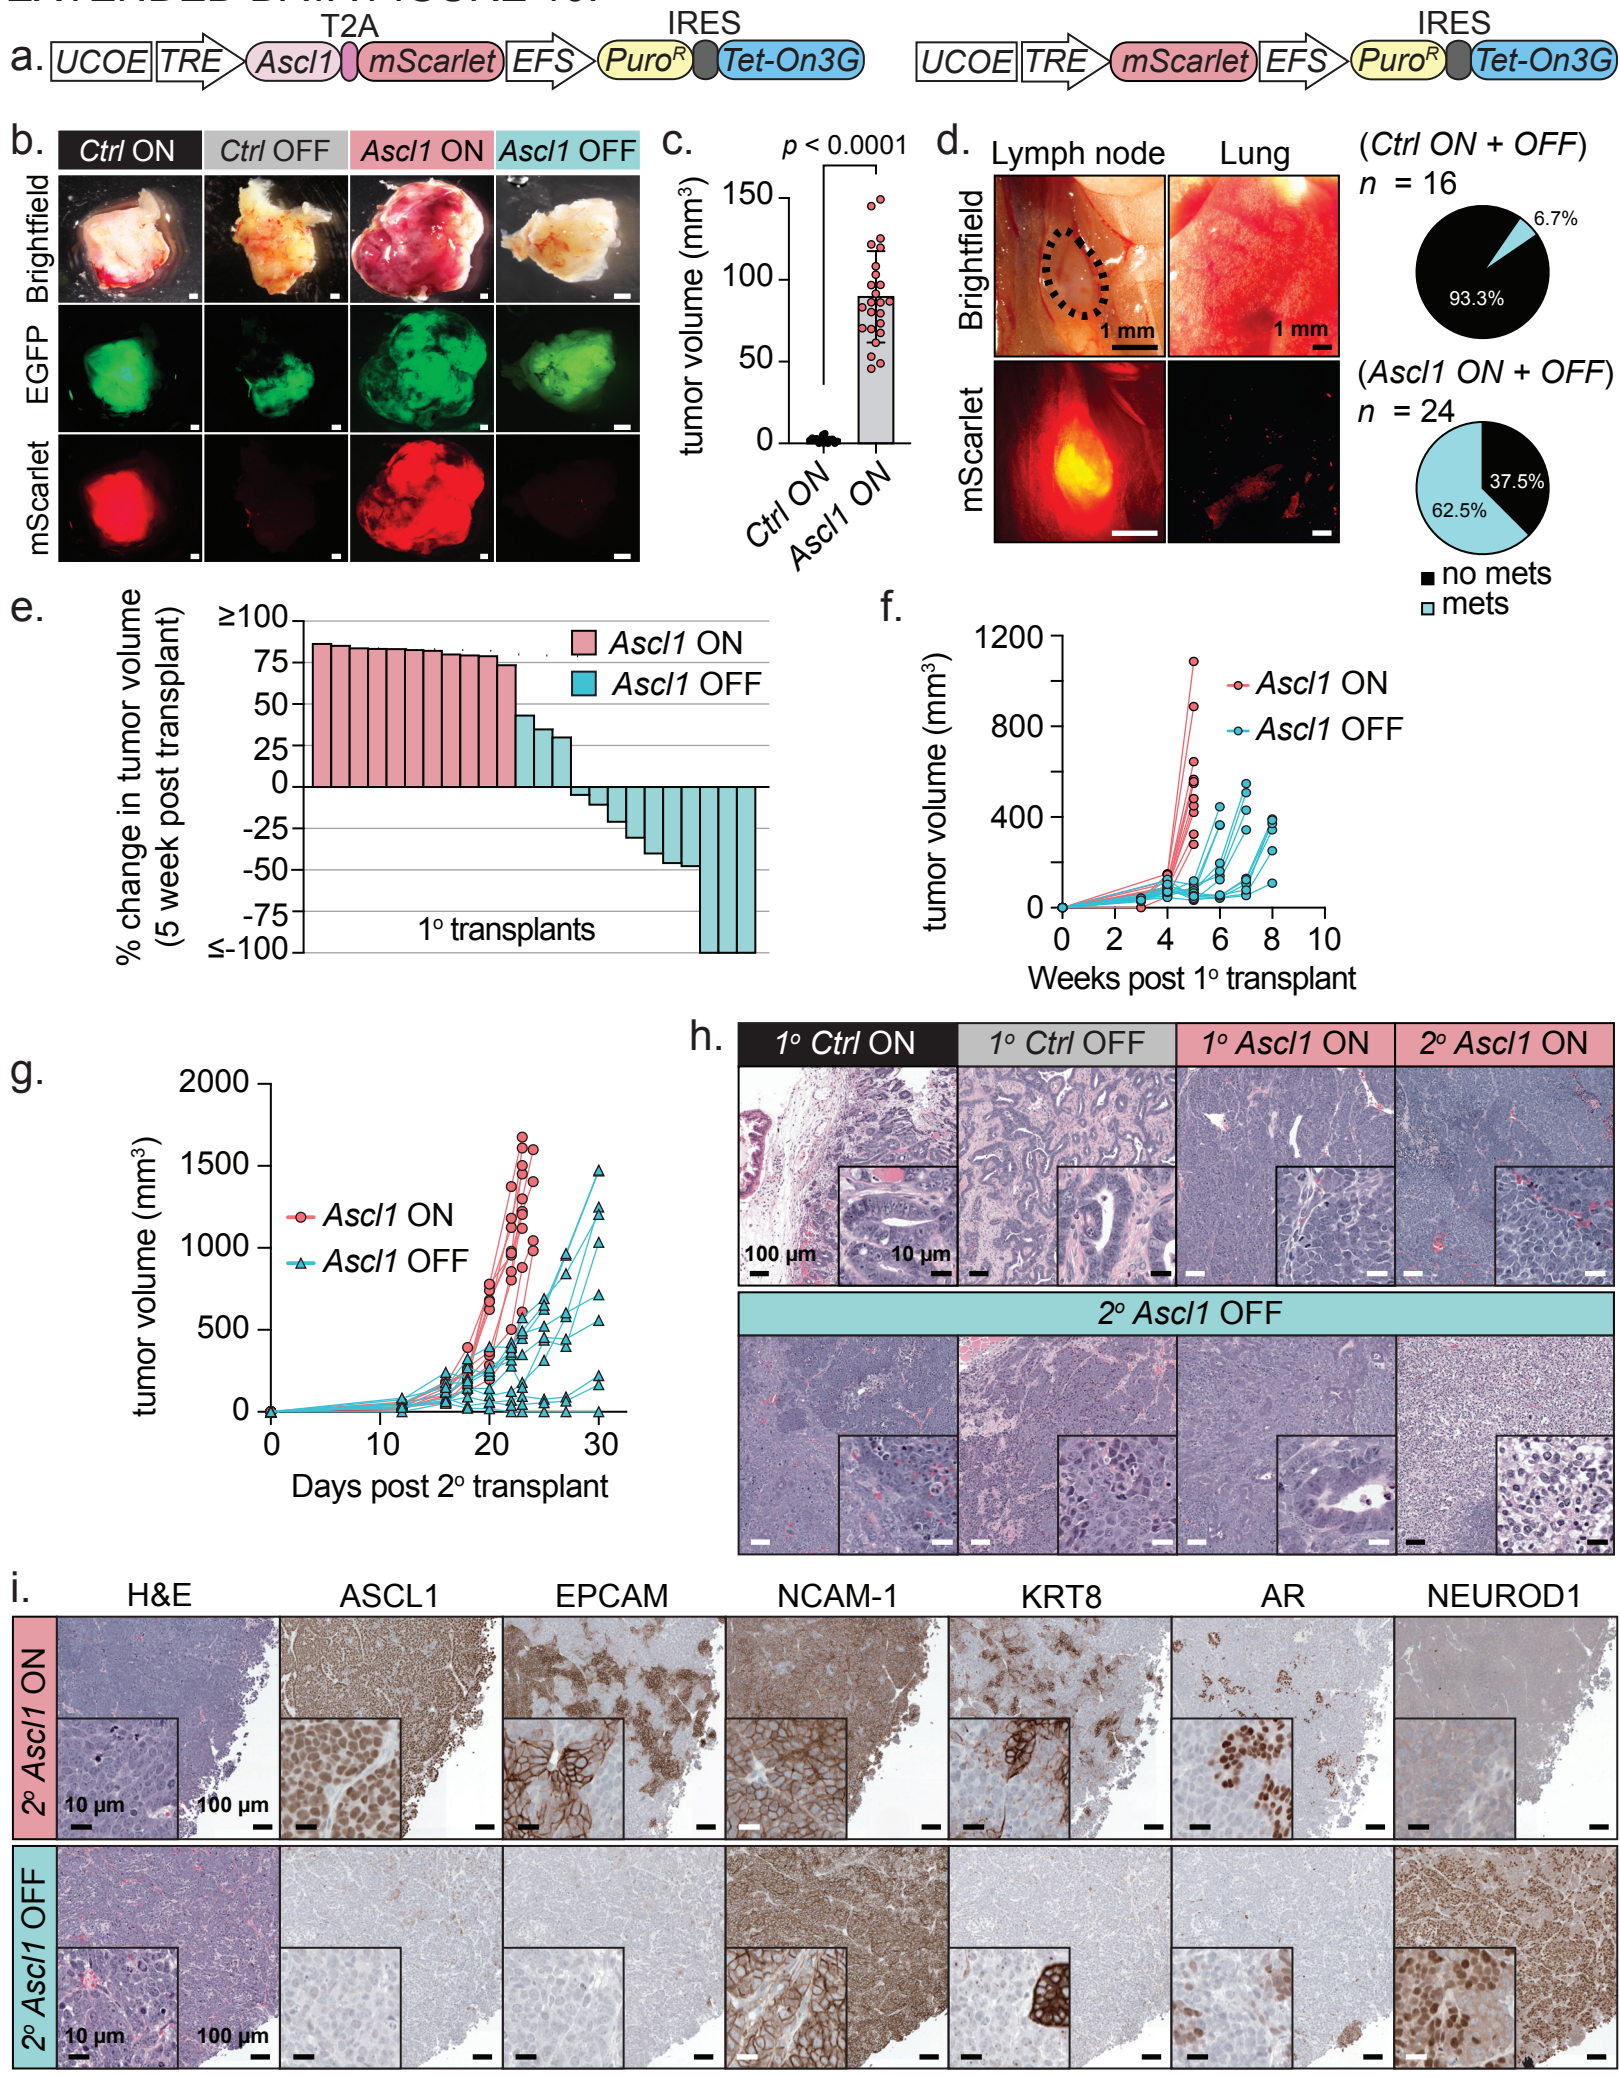

1 **Extended Data Figure 10:**  
2 **a.** Schematic of the dox-inducible lentiviral vector used within this conditionally  
3 overexpress *Ascl1-P2A-mScarlet* or (not shown) *mScarlet* in RPM-*Ascl1*<sup>KO</sup> organoids.  
4 Related to Fig. 8. **b.** Representative stereoscopic images (brightfield and fluorescent) of  
5 OT tumors isolated from the indicated dox maintained or withdrawn conditions. Scale bar  
6 represents 1 mm. **c.** Tumor volumes determined by ultrasound 4 weeks post OT  
7 engraftment of the indicated groups. All mice were maintained on dox chow. Statistics  
8 derived from two-sided *t*-test and error bars denote mean and standard deviation. *Ctrl* ON  
9 *n*=15, *Ascl1* ON *n*=13. **d.** (Left) Representative stereoscopic images (brightfield and  
10 fluorescence) of the draining lymph nodes and lungs of mice bearing OT *Ascl1* ON  
11 tumors. (Right) Pie charts indicating frequency of regional or distal micro-metastatic  
12 dissemination. **e.** Percent change in primary recipient (1°) OT tumor volume between 4-5  
13 weeks post OT transplantation of *Ascl1* ON organoids, as determined by ultrasound.  
14 *Ascl1* OFF cohort has been withdrawn from dox-chow for 1 week. **f.** Longitudinal primary  
15 OT tumor volumes determined by ultrasound for the indicated groups. *Ascl1* ON *n*=11,  
16 *Ascl1* OFF *n*=13). **g.** Longitudinal secondary recipient (2°) SQ tumor volumes determined  
17 by caliper for the indicated groups. *Ascl1* ON and OFF *n*=10. **h.** Representative H&E  
18 images of the indicated groups spanning both primary recipient (OT) and secondary  
19 recipient (SQ) transplanted mice. **i.** Representative serially sectioned tumors stained for  
20 H&E and IHC of the indicated markers across *Ascl1* ON and *Ascl1* OFF secondary  
21 transplant recipient mice (SQ). Images displayed represent regions maintaining NEPC  
22 histology and high fraction of NCAM-1 marker expression. All scale bars depicted in the  
23 figure panels.
