# Supplementary material for: The neuroendocrine transition in prostate cancer is dynamic and dependent on ASCL1
Source: PubMed Central journal article supplement (PMC11030418; doi:10.1101/2024.04.09.588557), 2024-04-11

Source Data Fig 1:

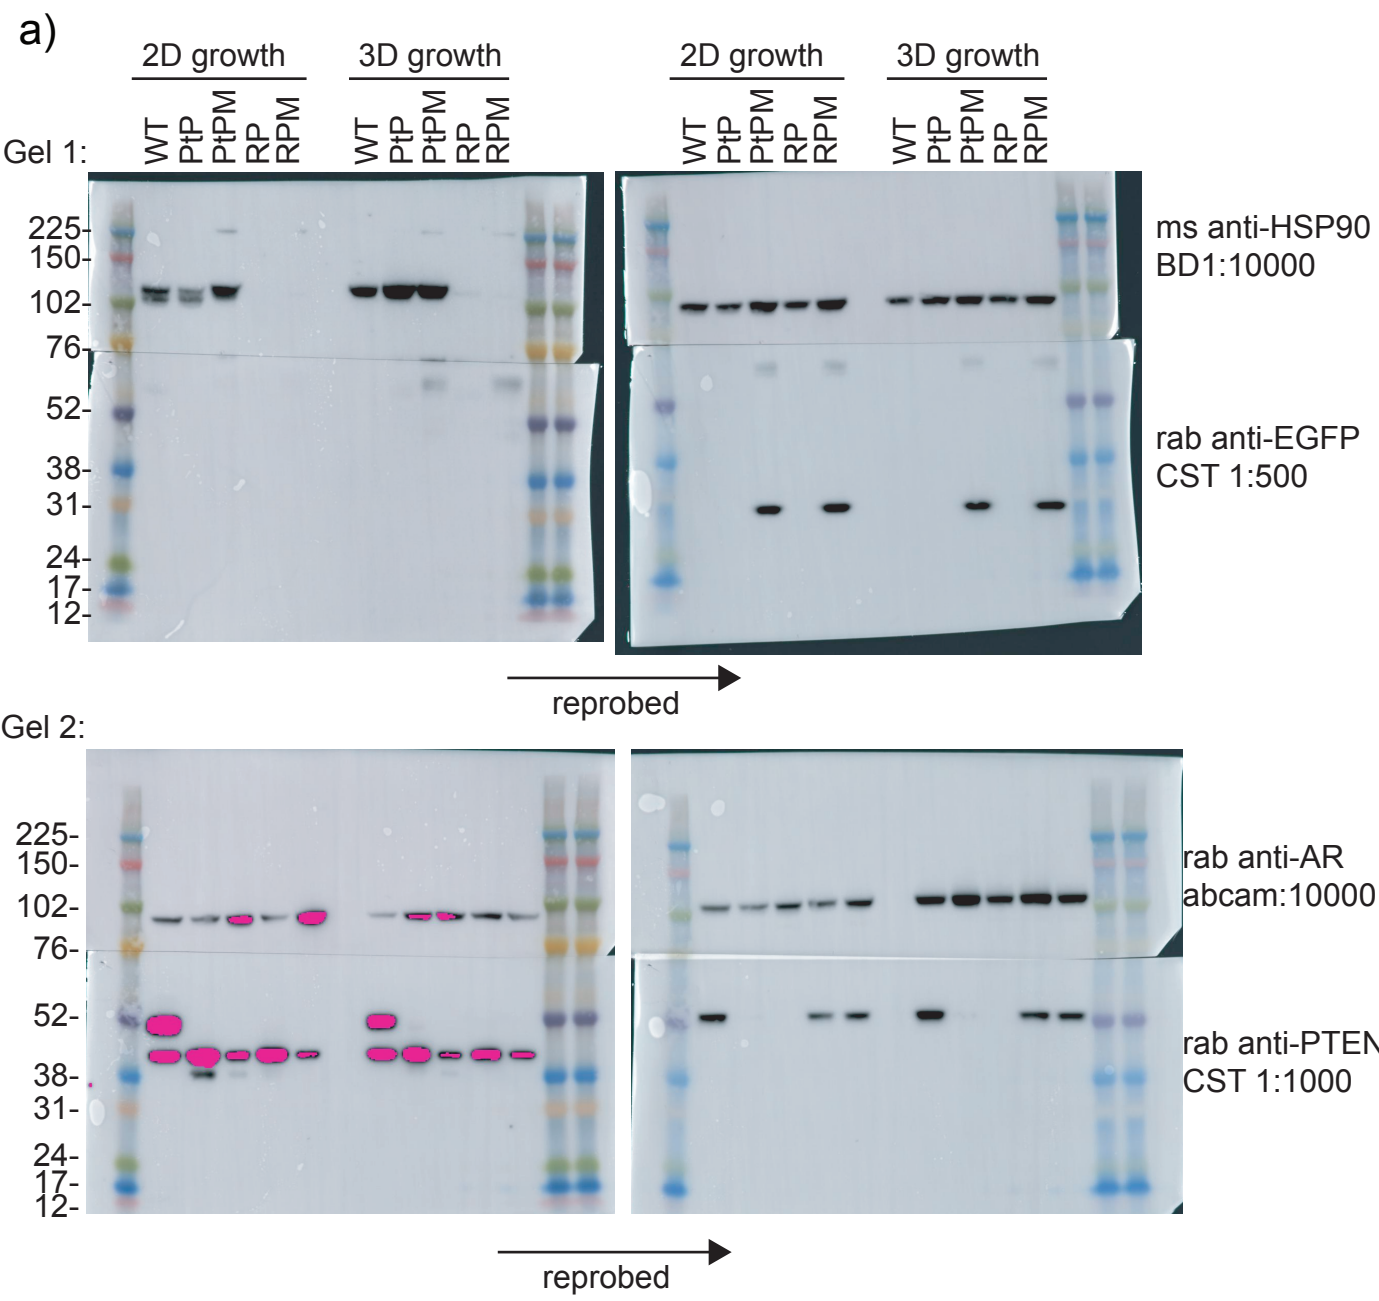

Supplement: media-4.pdf [file media-4.pdf]
